# Supplementary material
Source: MDPI journal article supplement (https://www.mdpi.com/2071-1050/9/7/1149)
Supplement: s1 [file s1]

**Table S1: Air Exchange Rate.** This table presents the calculated air exchange rate and related infiltration and mechanical ventilation-related flow rates calculated based on theoretical relationships and combined in quadrature in accordance with the methods described in the ASHRAE Fundamentals Handbook (ASHRAE 2013a).

| **House** | **Configuration** | **Qinf (CFM)** | **Runtime Fraction** | **Qunbalanced (CFM)** | **Qtot (CFM)** | **ACHn**  **(hr-1)** | **Runtime Fraction** | **Qunbalanced (CFM)** | **Qtot (CFM)** | **ACHn**  **(hr-1)** |
| --- | --- | --- | --- | --- | --- | --- | --- | --- | --- | --- |
| *First Summer Sampling Period* | | | | | | | | | | |
|  | | | SUM1.1 (RTV) | | | | SUM1.2 (CEV) | | | |
| **H1** | FF | 72.32 | 0.31 | 12.44 | 73.38 | 0.20 | 0.24 | 57.50 | 92.39 | 0.26 |
| **H2** | FF | 43.33 | 0.41 | 14.01 | 45.54 | 0.18 | 0.41 | 55.00 | 70.02 | 0.28 |
| **H4** | FF | 44.44 | 0.60 | 15.62 | 47.10 | 0.14 | 0.54 | 56.00 | 71.49 | 0.22 |
| **H6** | FF | 38.34 | 0.36 | 15.13 | 41.21 | 0.15 | 0.30 | 56.00 | 67.87 | 0.24 |
| **H8** | FF | 28.59 | 0.43 | 16.61 | 33.07 | 0.13 | 0.44 | 77.50 | 82.61 | 0.33 |
| **H9** | FF | 48.36 | 0.27 | 6.41 | 48.78 | 0.19 | 0.34 | 64.50 | 80.61 | 0.31 |
| **H3** | CEV | 30.49 | 0.57 | 54.50 | 62.45 | 0.24 | 0.46 | 54.50 | 62.45 | 0.24 |
| **H5** | CEV | 38.97 | 0.39 | 59.50 | 71.13 | 0.22 | 0.31 | 59.50 | 71.13 | 0.22 |
| **H7** | RTV | 44.63 | 0.57 | 18.23 | 48.21 | 0.15 | 0.47 | 14.95 | 47.07 | 0.14 |
| **H10** | RTV | 42.73 | 0.26 | 9.68 | 43.81 | 0.11 | 0.24 | 8.83 | 43.63 | 0.11 |
| *Winter/Mixed Sampling Period* | | | | | | | | | | |
|  | | | WIN1 (RTV) | | | | WIN2 (CEV) | | | |
| **H1** | FF | 72.32 |  |  |  |  |  |  |  |  |
| **H2** | FF | 43.33 | 0.13 | 4.51 | 43.56 | 0.17 | 0.07 | 55.00 | 70.02 | 0.28 |
| **H4** | FF | 44.44 | 0.04 | 1.12 | 44.45 | 0.13 | 0.29 | 56.00 | 71.49 | 0.22 |
| **H6** | FF | 38.34 | 0.01 | 0.41 | 38.34 | 0.14 | 0.11 | 56.00 | 67.87 | 0.24 |
| **H8** | FF | 28.59 | 0.02 | 0.68 | 28.60 | 0.11 | 0.46 | 77.50 | 82.61 | 0.33 |
| **H9** | FF | 48.36 | 0.00 | 0.00 | 48.36 | 0.19 | 0.08 | 64.50 | 80.61 | 0.31 |
| **H3** | CEV | 30.49 | 0.12 | 54.50 | 62.45 | 0.24 | 0.19 | 54.50 | 62.45 | 0.24 |
| **H5** | CEV | 38.97 | 0.05 | 59.50 | 71.13 | 0.22 | 0.12 | 59.50 | 71.13 | 0.22 |
| **H7** | RTV | 44.63 | 0.12 | 3.71 | 44.79 | 0.14 | 0.21 | 6.84 | 45.15 | 0.14 |
| **H10** | RTV | 42.73 | 0.00 | 0.00 | 42.73 | 0.10 | 0.08 | 3.13 | 42.85 | 0.10 |
| *Second Summer Sampling Period* | | | | | | | | | | |
|  | | | SUM2.1 (RTV) | | | | SUM2.2 (CEV) | | | |
| **H1** | FF | 72.32 |  |  |  |  |  |  |  |  |
| **H2** | FF | 43.33 | 0.44 | 14.98 | 45.84 | 0.18 | 0.43 | 55.00 | 70.02 | 0.28 |
| **H4** | FF | 44.44 | 0.58 | 14.96 | 46.89 | 0.14 |  |  |  |  |
| **H6** | FF | 38.34 | 0.35 | 14.69 | 41.05 | 0.15 | 0.29 | 56.00 | 67.87 | 0.24 |
| **H8** | FF | 28.59 | 0.41 | 16.05 | 32.79 | 0.13 | 0.42 | 77.50 | 82.61 | 0.33 |
| **H9** | FF | 48.36 | 0.38 | 9.06 | 49.20 | 0.19 | 0.47 | 64.50 | 80.61 | 0.31 |
| **H3** | CEV | 30.49 | 0.62 | 54.50 | 62.45 | 0.24 | 0.63 | 54.50 | 62.45 | 0.24 |
| **H5** | CEV | 38.97 |  |  |  |  |  |  |  |  |
| **H7** | RTV | 44.63 | 0.64 | 20.50 | 49.12 | 0.15 | 0.54 | 17.25 | 47.85 | 0.14 |
| **H10** | RTV | 42.73 | 0.32 | 11.86 | 44.35 | 0.11 | 0.33 | 12.24 | 44.45 | 0.11 |

**Table S2: Primary CO2 Data.** Concentrations in of CO2 ppm, corrected for the outdoor concentration and field blank.

| **Ventilation Configuration** | **Homes** | **SUM1**  **(ppm)** | **SUM2**  **(ppm)** | **SUM1 Diff**  **(ppm)** | **SUM1 Perc. Diff**  **(%)** | **WIN1**  **(ppm)** | **WIN2**  **(ppm)** | **WIN Diff**  **(ppm)** | **WIN Perc. Diff**  **(%)** | **SUM2.1**  **(ppm)** | **SUM2.2**  **(ppm)** | **SUM2 Diff**  **(ppm)** | **SUM2 Perc. Diff**  **(%)** |
| --- | --- | --- | --- | --- | --- | --- | --- | --- | --- | --- | --- | --- | --- |
| **FF** | H1 | 577.86 | 346.84 | 5.36 | 17.95 |  |  |  |  |  |  |  |  |
| **FF** | H2 | 471.48 | 264.67 | 1.36 | 7.61 | 340.09 | 297.53 | -0.51 | -4.08 | 290.82 | 349.38 | -0.90 | -5.39 |
| **FF** | H4 | 394.85 | 187.33 | 3.36 | 16.92 | 343.64 | 440.65 |  |  | 408.33 | 363.61 |  |  |
| **FF** | H6 | 369.90 | 224.15 | -4.64 | -13.70 | 271.13 | 226.79 | -6.51 | -20.67 | 311.03 | 329.22 | -29.60 |  |
| **FF** | H8 | 263.06 | 207.76 | 6.36 | 22.04 | 594.22 |  | -3.51 | -20.06 |  |  | -8.90 | -56.69 |
| **FF** | H9 | 681.93 | 250.67 | -16.10 | -42.53 | 874.43 | 393.18 | 3.49 | 10.12 | 654.88 | 421.88 | 0.10 | 0.31 |
| FF | **AVG** | **459.85** | **246.90** | **-0.72** | **1.38** | **484.70** | **339.54** | **-1.76** | **-8.67** | **416.27** | **366.02** | **-9.83** | **-20.59** |
| **STDEV** | **151.28** | **56.42** | **8.49** | **25.05** | **250.15** | **95.88** | **4.27** | **14.69** | **167.15** | **39.82** | **13.78** | **31.39** |
| **N** | **6.00** | **6.00** | **6.00** | **6.00** | **5.00** | **4.00** | **4.00** | **4.00** | **4.00** | **4.00** | **4.00** | **3.00** |
| **95% CI** | **158.76** | **59.21** | **8.91** | **26.29** | **310.61** | **152.57** | **6.80** | **23.38** | **265.97** | **63.36** | **21.93** | **77.98** |
| **CEV** | H3 | 666.54 | 377.96 | 4.36 | 17.54 | 371.42 | 345.49 | -0.01 | -0.06 | 341.45 | 432.23 | 0.10 | 0.51 |
| **CEV** | H5 | 548.92 | 406.73 | 1.36 | 5.26 | 168.76 | 353.63 | 5.49 | 28.15 |  |  | -26.60 |  |
| CEV | **AVG** | **607.73** | **392.34** | **2.86** | **11.40** | **270.09** | **349.56** | **2.74** | **14.05** | **341.45** | **432.23** | **-13.25** | **0.51** |
| **STDEV** | **83.17** | **20.34** | **2.12** | **8.68** | **143.30** | **5.75** | **3.89** | **19.95** |  |  | **18.88** |  |
| **N** | **2.00** | **2.00** | **2.00** | **2.00** | **2.00** | **2.00** | **2.00** | **2.00** | **1.00** | **1.00** | **2.00** | **1.00** |
| **95% CI** | **747.25** | **182.78** | **19.06** | **78.01** | **1287.50** | **51.69** | **34.94** | **179.24** |  |  | **169.63** |  |
| **RTV** | H7 | 820.82 | 555.05 | 1.36 | 9.81 | 664.69 | 582.53 | 2.49 | 17.17 | 524.33 | 869.60 | -1.40 | -13.08 |
| **RTV** | H10 | 523.50 | 562.57 | -19.64 | -82.31 | 344.19 | 833.26 | -8.51 | -25.40 | 497.58 | 481.23 | -1.90 | -8.37 |
| RTV | **AVG** | **672.16** | **558.81** | **-9.14** | **-36.25** | **504.44** | **707.90** | **-3.01** | **-4.12** | **510.95** | **675.41** | **-1.65** | **-10.73** |
| **STDEV** | **210.24** | **5.32** | **14.85** | **65.14** | **226.62** | **177.30** | **7.78** | **30.11** | **18.91** | **274.62** | **0.35** | **3.33** |
| **N** | **2.00** | **2.00** | **2.00** | **2.00** | **2.00** | **2.00** | **2.00** | **2.00** | **2.00** | **2.00** | **2.00** | **2.00** |
| **95% CI** | **1888.93** | **47.76** | **133.42** | **585.29** | **2036.14** | **1592.94** | **69.88** | **270.49** | **169.92** | **2467.33** | **3.18** | **29.95** |

**Table S3: Primary Formaldehyde Data.** Concentrations in of formaldehyde ppb, corrected for the outdoor concentration and field blank.

| **Ventilation Configuration** | **Homes** | **SUM1**  **(ppb)** | **SUM2**  **(ppb)** | **SUM1 Diff**  **(ppb)** | **SUM1 Perc. Diff**  **(%)** | **WIN1**  **(ppb)** | **WIN2**  **(ppb)** | **WIN Diff**  **(ppb)** | **WIN Perc. Diff**  **(%)** | **SUM2.1**  **(ppb)** | **SUM2.2**  **(ppb)** | **SUM2 Diff**  **(ppb)** | **SUM2 Perc. Diff**  **(%)** |
| --- | --- | --- | --- | --- | --- | --- | --- | --- | --- | --- | --- | --- | --- |
| **FF** | H1 | 24.50 | 29.86 | 5.36 | 17.95 |  |  |  |  |  |  |  |  |
| **FF** | H2 | 16.50 | 17.86 | 1.36 | 7.61 | 13.01 | 12.50 | -0.51 | -4.08 | 17.60 | 16.70 | -0.90 | -5.39 |
| **FF** | H4 | 16.50 | 19.86 | 3.36 | 16.92 |  |  |  |  |  |  |  |  |
| **FF** | H6 | 38.50 | 33.86 | -4.64 | -13.70 | 38.01 | 31.50 | -6.51 | -20.67 | 29.60 |  | -29.60 |  |
| **FF** | H8 | 22.50 | 28.86 | 6.36 | 22.04 | 21.01 | 17.50 | -3.51 | -20.06 | 24.60 | 15.70 | -8.90 | -56.69 |
| **FF** | H9 | 53.96 | 37.86 | -16.10 | -42.53 | 31.01 | 34.50 | 3.49 | 10.12 | 32.60 | 32.70 | 0.10 | 0.31 |
| FF | **AVG** | **28.74** | **28.03** | **-0.72** | **1.38** | **25.76** | **24.00** | **-1.76** | **-8.67** | **26.10** | **21.70** | **-9.83** | **-20.59** |
| **STDEV** | **14.75** | **7.81** | **8.49** | **25.05** | **11.00** | **10.66** | **4.27** | **14.69** | **6.56** | **9.54** | **13.78** | **31.39** |
| **N** | **6.00** | **6.00** | **6.00** | **6.00** | **4.00** | **4.00** | **4.00** | **4.00** | **4.00** | **3.00** | **4.00** | **3.00** |
| **95% CI** | **15.48** | **8.19** | **8.91** | **26.29** | **17.50** | **16.96** | **6.80** | **23.38** | **10.43** | **23.70** | **21.93** | **77.98** |
| **CEV** | H3 | 20.50 | 24.86 | 4.36 | 17.54 | 17.01 | 17.00 | -0.01 | -0.06 | 19.60 | 19.70 | 0.10 | 0.51 |
| **CEV** | H5 | 24.50 | 25.86 | 1.36 | 5.26 | 14.01 | 19.50 | 5.49 | 28.15 | 26.60 |  | -26.60 |  |
| CEV | **AVG** | **22.50** | **25.36** | **2.86** | **11.40** | **15.51** | **18.25** | **2.74** | **14.05** | **23.10** | **19.70** | **-13.25** | **0.51** |
| **STDEV** | **2.83** | **0.71** | **2.12** | **8.68** | **2.12** | **1.77** | **3.89** | **19.95** | **4.95** |  | **18.88** |  |
| **N** | **2.00** | **2.00** | **2.00** | **2.00** | **2.00** | **2.00** | **2.00** | **2.00** | **2.00** | **1.00** | **2.00** | **1.00** |
| **95% CI** | **25.41** | **6.35** | **19.06** | **78.01** | **19.06** | **15.88** | **34.94** | **179.24** | **44.47** |  | **169.63** |  |
| **RTV** | H7 | 12.50 | 13.86 | 1.36 | 9.81 | 12.01 | 14.50 | 2.49 | 17.17 | 12.10 | 10.70 | -1.40 | -13.08 |
| **RTV** | H10 | 43.50 | 23.86 | -19.64 | -82.31 | 42.01 | 33.50 | -8.51 | -25.40 | 24.60 | 22.70 | -1.90 | -8.37 |
| RTV | **AVG** | **28.00** | **18.86** | **-9.14** | **-36.25** | **27.01** | **24.00** | **-3.01** | **-4.12** | **18.35** | **16.70** | **-1.65** | **-10.73** |
| **STDEV** | **21.92** | **7.07** | **14.85** | **65.14** | **21.21** | **13.44** | **7.78** | **30.11** | **8.84** | **8.49** | **0.35** | **3.33** |
| **N** | **2.00** | **2.00** | **2.00** | **2.00** | **2.00** | **2.00** | **2.00** | **2.00** | **2.00** | **2.00** | **2.00** | **2.00** |
| **95% CI** | **196.95** | **63.53** | **133.42** | **585.29** | **190.59** | **120.71** | **69.88** | **270.49** | **79.41** | **76.24** | **3.18** | **29.95** |
